# Supplementary material for: Hydrogen bonds delicately restraining photoelectric performance in hybrid perovskites
Source: Royal Society of Chemistry journal article supplement (doi:10.1039/d3ta07925b), 2024-01-01
Supplement: d3ta07925b1.pdf [file d3ta07925b1.pdf]

## Hydrogen bonds delicately restraining photoelectric performance in hybrid perovskite

Shengjian Qin<sup>1,2</sup>, Yanglei Liu<sup>2</sup>, Rui Li<sup>2</sup>, Yinan Jiao<sup>2</sup>, Hengbin Chen<sup>2</sup>, Jinjin Zhao<sup>1,\*</sup>

<sup>1</sup> Hebei Technology Innovation Center for Energy Conversion Materials and Devices, Hebei Key Laboratory of Inorganic Nanomaterials, Engineering Research Center of Thin Film Solar Cell Materials and Devices, Hebei Province, College of Chemistry and Materials Science, Hebei Normal University, Shijiazhuang, Hebei, 050024, China

<sup>2</sup> School of Materials Science and Engineering, Shijiazhuang Tiedao University, Shijiazhuang 050043, China

\* Corresponding author: jinjinzhao2012@163.com; jinjinzhao2023@hebtu.edu.cn

### Supplementary Information

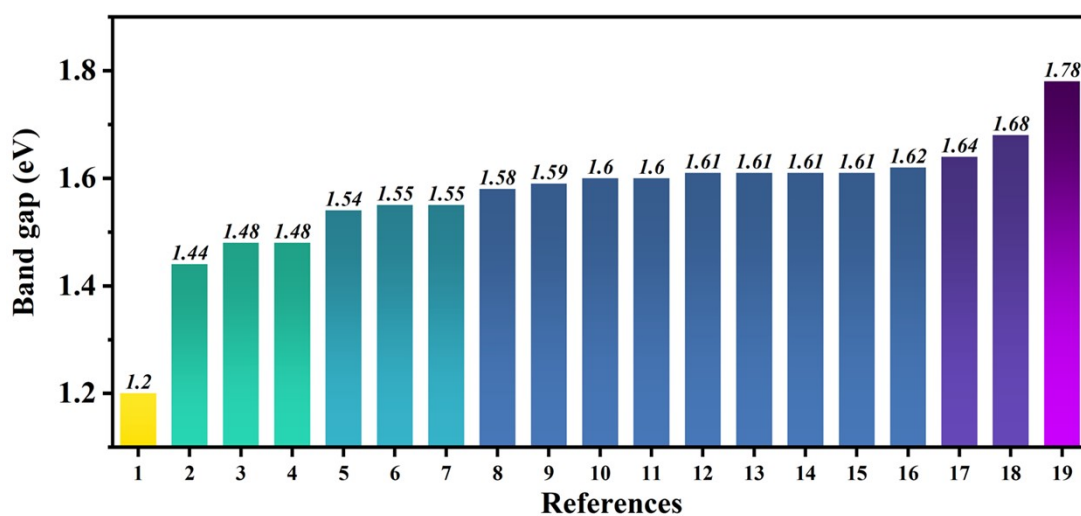

Fig. S1: Band gaps of tetragonal MAPbI<sub>3</sub> phase obtained from experimental and theoretical studies<sup>1-19</sup>.

Table S1. The MA<sup>+</sup> orientation, lattice parameters and relative energy  $\Delta E$  of the 61 tetragonal MAPbI<sub>3</sub> phase.  $\Delta E$  is referenced to the lowest-energy structure of the 61 models.

| Structure | MA <sup>+</sup><br>orientation | Lattice parameters |        |         | $\Delta E$<br>(eV) |
|-----------|--------------------------------|--------------------|--------|---------|--------------------|
|           |                                | a, b, c (Å)        |        |         |                    |
| 1         | A+ A- A+ A-                    | 8.9349             | 8.8135 | 13.0750 | 0.0247             |
| 2         | A+ A+ A+ A-                    | 8.8486             | 8.9103 | 13.0610 | 0.0045             |
| 3         | A+ A+ A+ B+                    | 8.7999             | 8.9569 | 13.0586 | 0.0846             |
| 4         | A+ A- A+ B+                    | 8.8420             | 8.9163 | 13.0716 | 0.0137             |

|    |             |        |        |         |        |
|----|-------------|--------|--------|---------|--------|
| 5  | A+ A- A+ B- | 8.8753 | 8.8950 | 13.0401 | 0.1032 |
| 6  | A+ A+ A- B- | 8.8462 | 8.9312 | 13.0439 | 0.0321 |
| 7  | A+ B+ B- A- | 8.8700 | 8.9626 | 12.9875 | 0.0757 |
| 8  | B+ B+ A+ A- | 8.8323 | 8.9320 | 13.0505 | 0.1024 |
| 9  | B+ B- A+ A+ | 8.8339 | 8.9297 | 13.0528 | 0.0986 |
| 10 | B+ B- A- A- | 8.9294 | 8.8308 | 13.0459 | 0.1322 |
| 11 | B+ B- A- A+ | 8.8628 | 8.8751 | 13.0848 | 0.0026 |
| 12 | B+ A+ B+ A+ | 8.8149 | 8.9273 | 13.0848 | 0.0175 |
| 13 | B+ A- B+ A- | 8.8308 | 8.9630 | 13.0202 | 0.1324 |
| 14 | B+ A+ B+ A- | 8.8830 | 8.8801 | 13.0646 | 0.1363 |
| 15 | B+ A+ B- A+ | 8.8457 | 8.9171 | 13.0652 | 0.1385 |
| 16 | B+ A- B- A- | 8.8259 | 8.9200 | 13.0830 | 0.0000 |
| 17 | A+ A+ A+ C- | 8.8611 | 8.8913 | 13.0983 | 0.0431 |
| 18 | A- A+ A+ C+ | 8.8968 | 8.9113 | 13.0173 | 0.1404 |
| 19 | A+ A+ A- C+ | 8.9286 | 8.9573 | 12.9651 | 0.1686 |
| 20 | A+ A- A+ C- | 8.8792 | 8.8687 | 13.0935 | 0.0470 |
| 21 | A+ C+ C+ A- | 8.9021 | 8.8742 | 13.0657 | 0.1546 |
| 22 | A+ C+ C- A+ | 8.9346 | 8.8756 | 13.0252 | 0.1534 |
| 23 | A- C+ C- A- | 8.9000 | 8.8730 | 13.0639 | 0.1713 |
| 24 | A- C+ C- A+ | 8.9629 | 8.8545 | 13.0438 | 0.0993 |
| 25 | C+ C+ A+ A- | 8.8981 | 8.8720 | 13.0860 | 0.1087 |
| 26 | C+ C- A+ A+ | 8.9049 | 8.8545 | 13.0579 | 0.0381 |
| 27 | C+ C- A- A- | 8.8761 | 8.8836 | 13.0907 | 0.1062 |
| 28 | C+ C- A+ A- | 8.8962 | 8.8427 | 13.0995 | 0.0056 |
| 29 | C+ C- A- A+ | 8.9009 | 8.8380 | 13.0936 | 0.0072 |
| 30 | C+ A- C+ A- | 8.8944 | 8.8738 | 13.1084 | 0.0923 |
| 31 | C+ A+ C+ A- | 8.9439 | 8.9103 | 13.0422 | 0.2063 |
| 32 | C+ A+ C- A+ | 8.9448 | 8.9207 | 13.0134 | 0.1802 |
| 33 | C+ A- C- A- | 8.9565 | 8.9459 | 12.9966 | 0.2181 |
| 34 | C+ A+ C- A- | 8.9387 | 8.9377 | 12.9832 | 0.2506 |
| 35 | A+ A+ B+ C+ | 8.8787 | 8.9412 | 13.0252 | 0.0934 |
| 36 | A+ B+ A+ C+ | 8.8755 | 8.9104 | 13.0787 | 0.0926 |
| 37 | A+ A+ B- C- | 8.8937 | 8.8983 | 13.0287 | 0.0461 |
| 38 | A+ B- A+ C- | 8.9329 | 8.8245 | 13.0807 | 0.1231 |
| 39 | A+ B+ A+ C- | 8.8459 | 8.9152 | 13.0822 | 0.0532 |
| 40 | A+ A- B+ C+ | 8.8582 | 8.8951 | 13.0751 | 0.0224 |
| 41 | A+ A- B- C- | 8.9485 | 8.8853 | 12.9648 | 0.1566 |
| 42 | A+ A- B- C+ | 8.9582 | 8.7811 | 13.0802 | 0.1285 |
| 43 | A+ A- B+ C- | 8.8769 | 8.8734 | 13.0651 | 0.0950 |
| 44 | A+ B+ A- C- | 8.8863 | 8.9285 | 13.0461 | 0.1501 |
| 45 | A+ B- A- C+ | 8.8560 | 9.0227 | 12.9442 | 0.1773 |
| 46 | A+ B- C+ A- | 8.9010 | 8.9432 | 12.9944 | 0.1577 |
| 47 | A+ C+ B+ D+ | 8.8999 | 8.8714 | 13.0582 | 0.1598 |
| 48 | A- B+ C+ D+ | 8.9276 | 8.8414 | 13.0647 | 0.0128 |

|         |             |        |        |         |        |
|---------|-------------|--------|--------|---------|--------|
| 49      | A+ B+ C- D+ | 8.8663 | 8.9065 | 13.0486 | 0.0990 |
| 50      | A+ B+ C+ D- | 8.8936 | 8.8252 | 13.0974 | 0.1499 |
| 51      | A+ C- B+ D+ | 8.8880 | 8.9646 | 13.0046 | 0.1559 |
| 52      | A+ C+ B+ D- | 8.9137 | 8.9576 | 12.9915 | 0.1567 |
| 53      | A- B+ C- D+ | 8.8828 | 8.8810 | 13.0543 | 0.0960 |
| 54      | A- B+ C+ D- | 8.8829 | 8.8396 | 13.0983 | 0.1735 |
| 55      | A+ B- C- D+ | 8.8877 | 8.8312 | 13.1038 | 0.1501 |
| 56      | A+ B- C+ D- | 8.8648 | 8.9251 | 13.0756 | 0.2484 |
| 57      | A+ B+ C- D- | 8.9146 | 8.9666 | 12.9043 | 0.2181 |
| 58      | A- C+ B+ D- | 8.9516 | 8.8169 | 13.0366 | 0.1040 |
| 59      | A+ C- B- D+ | 8.9598 | 8.8122 | 13.0420 | 0.0824 |
| 60      | A- B- D+ C+ | 8.9539 | 8.8831 | 12.9689 | 0.1038 |
| 61      | A+ B+ D- C- | 8.7794 | 9.0157 | 13.0196 | 0.0954 |
| Average | -           | 8.8897 | 8.8968 | 13.0470 | -      |

Table S2. Calculated and experimental structural parameters for tetragonal MAPbI<sub>3</sub> phase.

| Methods                  | a (Å) | b (Å) | c (Å) | Average deviation (%) |
|--------------------------|-------|-------|-------|-----------------------|
| PBE                      | 9.03  | 9.03  | 13.36 | 3.25                  |
| PBE+optB86-vdW           | 8.88  | 8.88  | 13.05 | 1.31                  |
| PBE+D3                   | 8.76  | 8.76  | 12.95 | 1.50                  |
| Experiment <sup>20</sup> | 8.85  | 8.85  | 12.64 | /                     |

## References

1. K. P. Ong, S. Wu, T. H. Nguyen, D. J. Singh, Z. Fan, M. B. Sullivan and C. Dang, *Sci. Rep.*, 2019, **9**, 2144.
2. A. Kojima, K. Teshima, Y. Shirai and T. Miyasaka, *J. Am. Chem. Soc.*, 2009, **131**, 6050–6051.
3. M. Zhong, W. Zeng, H. Tang, L. Wang, F. Liu, B. Tang and Q. Liu, *Solar Energy*, 2019, **190**, 617-621.
4. Y. Dang, Y. Liu, Y. Sun, D. Yuan, X. Liu, W. Lu, G. Liu, H. Xia and X. Tao, *CrystEngComm*, 2015, **17**, 665-670.
5. K. Frohna, T. Deshpande, J. Harter, W. Peng, B. A. Barker, J. B. Neaton, S. G. Louie, O. M. Bakr, D. Hsieh and Marco Bernardi, *Nat. Commun.*, 2018, **9**, 1829.
6. O. Schuster, P. Wientjes, S. Shrestha, I. Levchuk, M. Sytnyk, G. J. Matt, A.

- Osvet, M. Batentschuk, W. Heiss, C. J. Brabec, T. Fauster and D. Niesner, *Nano Lett.*, 2020, **20**, 3090-3097.
7. E. Mosconi, A. Amat, M. K. Nazeeruddin, M. Grätzel and F. D. Angelis, *J. Phys. Chem. C*, 2013, **117**, 13902-13913.
  8. L. Atourki, E. Vega, B. Marí, M. Mollar, H. A. Ahsaine, K. Bouabid and A. Ihlal, *Appl. Surf. Sci.*, 2016, **371**, 112-117.
  9. M. N. F. Hoque, N. Islam, Z. Li and Z. Fan, *ChemSusChem*, 2016, **9**, 2692-2698.
  10. H. Kim, J. Hunger, E. Cánovas, M. Karakus, Z. Mics, M. Grechko, D. Turchinovich, S. H. Parekh and M. Bonn, *Nat. Commun.*, 2017, **8**, 687.
  11. W. Geng, L. Zhang, Y. Zhang, W. Lau and L. Liu, *J. Phys. Chem. C*, 2014, **118**, 19565-19571.
  12. C. Quarti, E. Mosconi, J. M. Ball, V. D’Innocenzo, C. Tao, S. Pathak, H. J. Snaith, A. Petrozza and F. D. Angelis, *Energ. Environ. Sci.*, 2016, **9**, 155-163.
  13. K. Galkowski, A. Mitioglu, A. Miyata, P. Plochocka, O. Portugall, G. E. Eperon, J. T. Wang, T. Stergiopoulos, S. D. Stranks, H. J. Snaith and R. J. Nicholas, *Energ. Environ. Sci.*, 2016, **9**, 962-970.
  14. L. Guo, G. Xu, G. Tang, D. Fang and J. Hong, *Nanotechnology*, 2020, **31**, 225204.
  15. J. Even, L. Pedesseau and C. Katan, *J. Phys. Chem. C*, 2014, **118**, 11566-11572.
  16. S. Jiang, Y. Fang, R. Li, H. Xiao, J. Crowley, C. Wang, T. J. White, W. A. G. III, Z. Wang, T. Baikie and J. Fang, *Angew Chem. Int. Edit.*, 2016, **55**, 6540-6544.
  17. S. Singh, C. Li, F. Panzer, K. L. Narasimhan, A. Graeser, T. P. Gujar, A. Köhler, M. Thelakkat, S. Huettner and D. Kabra, *J. Phys. Chem. Lett.*, 2016, **7**, 3014-3021.
  18. W. Gao, X. Gao, T. A. Abtew, Y. Sun, S. Zhang and P. Zhang, *Physical Review B* 2016, **93**, 085202.
  19. A. D. Vito, A. Pecchia, M. A. der Maur, V. Campanari, F. Martelli and A. D. Carlo, *J. Phys. Chem. Lett.*, 2021, **12**, 11659-11665.
  20. C. C. Stoumpos, C. D. Malliakas and M. G. Kanatzidis, *Inorg. Chem.*, 2013, **52**, 9019-9038.
